# Supplementary material for: Proinflammatory Effect of Carbon-Based Nanomaterials: In Vitro Study on Stimulation of Inflammasome NLRP3 via Destabilisation of Lysosomes
Source: Nanomaterials (Basel). 2020 Feb 27;10(3):418. doi: 10.3390/nano10030418 (PMC7152843; doi:10.3390/nano10030418)
Supplement: Supplementary file 1 [file nanomaterials-10-00418-s001.pdf]

# Proinflammatory Effect of Carbon-Based Nanomaterials: In Vitro Study on Stimulation of Inflammasome NLRP3 via Destabilisation of Lysosomes

Tereza Svadlakova <sup>1,2</sup>, Frantisek Hubatka <sup>3</sup>, Pavlina Turanek Knotigova <sup>3</sup>, Pavel Kulich <sup>3</sup>, Josef Masek <sup>3</sup>, Jan Kotoucek <sup>3</sup>, Jan Macak <sup>4</sup>, Martin Motola <sup>4</sup>, Martin Kalbac <sup>5</sup>, Martina Kolackova <sup>1</sup>, Radka Vankova <sup>1</sup>, Petra Vicherkova <sup>1</sup>, Andrea Malkova <sup>2</sup>, Pavlina Simeckova <sup>3</sup>, Yuri Volkov <sup>6,7</sup>, Adriele Prina-Mello <sup>6</sup>, Irena Kratochvilova <sup>8</sup>, Zdenek Fiala <sup>2</sup>, Milan Raska <sup>3,9</sup>, Jan Krejsek <sup>1\*</sup> and Jaroslav Turanek <sup>3,\*</sup>

<sup>1</sup> Institute of Clinical Immunology and Allergology, University Hospital Hradec Kralove and Faculty of Medicine in Hradec Kralove, Charles University, 50005 Hradec Kralove, Czech Republic; svadlakovat@lfhk.cuni.cz (T.S.); kolackovam@lfhk.cuni.cz (M.K.); vankovr@lfhk.cuni.cz (R.V.); petraavicherkova@gmail.com (P.V.)

<sup>2</sup> Institute of Hygiene and Preventive Medicine, Faculty of Medicine in Hradec Kralove, Charles University, 50003 Hradec Kralove, Czech Republic; Malka8AR@lfhk.cuni.cz (A.M.); fiala@lfhk.cuni.cz (Z.F.)

<sup>3</sup> Veterinary Research Institute, 62100 Brno, Czech Republic; hubatka@vri.cz (F.H.); knotigova@vri.cz (P.T.K.); kulich@vri.cz (P.K.); masek@vri.cz (J.M.); kotoucek@vri.cz (J.K.); simeckova@vri.cz (P.S.); milan.raska@upol.cz (M.R.)

<sup>4</sup> Center of Materials and Nanotechnologies, Faculty of Chemical Technology, University of Pardubice, 53002 Pardubice, Czech Republic; Jan.Macak@upce.cz (J.Ma.); martin.motola@upce.cz (M.M.)

<sup>5</sup> J. Heyrovsky Institute of Physical Chemistry of the Czech Academy of Sciences, 18223 Prague, Czech Republic; martin.kalbac@jh-inst.cas.cz (M.Ka.)

<sup>6</sup> Department of Clinical Medicine/Trinity Translational Medicine Institute (TTMI), Trinity College Dublin, D08 W9RT, Dublin, Ireland; yvolkov@tcd.ie (Y.V.); prinamea@tcd.ie (A.P.M.)

<sup>7</sup> Department of Histology, Cytology and Embryology, First Moscow State Sechenov Medical University, 119992, Moscow, Russian Federation

<sup>8</sup> Institute of Physics, Czech Academy of Sciences, 18200 Prague, Czech Republic; krat@fzu.cz (I.K.)

<sup>9</sup> Department of Immunology and Institute of Molecular and Translational Medicine, Faculty of Medicine and Dentistry, Palacky University Olomouc, 77515 Olomouc, Czech Republic

\* Correspondence: jan.krejsek@fnhk.cz (J.K.); turanek@vri.cz (J.T.)

Received: 07 February 2020; Accepted: 24 February 2020; Published: date

## XRD

### Experimental

The X-ray diffraction patterns (XRD) were measured on Panalytical Empyrean diffractometer using a Cu X-ray tube and scintillation detector Pixcel<sup>3D</sup> (ThermoFisher Scientific, Waltham, MA, USA). The measurements were performed in the 2θ range of 20 – 40°, the step size was 0.026°. The diffractometer was equipped with a *xyz* programmable stage.

### Results

Figure S1 shows the XRD patterns of studied C-BNM. In the case of MWCNT, the peak at 2θ ~26.3° with a d-spacing value of 3.38 Å is assigned to the (002) plane of the hexagonal graphite structure. In both GP1 and GP2, the peak centered at 2θ ~26.4° with d-spacing value of 3.36 Å is assigned to the (002) plane of the hexagonal structure. A dramatic decrease in the intensity of GP1 might be caused by the decrease of thickness of graphite due to the break of inter-planar carbon within graphite structure during the preparation method.

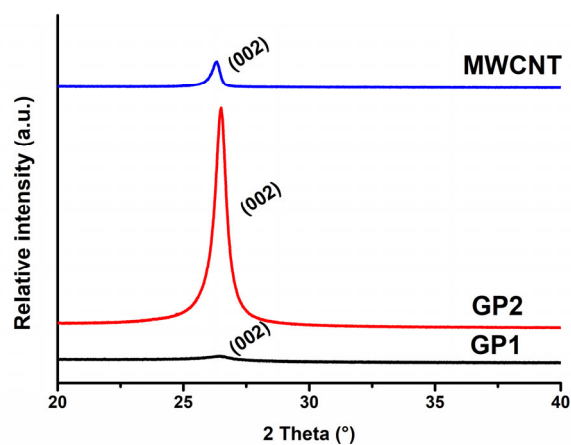

**Figure S1.** XRD patterns of C-BNM

### Elemental composition

Elemental compositions of C-BNM were analysed using Energy dispersive X-ray (EDS) analyses by mapping of surface area of 200 × 200 mm at 20 kV using EDS detector (AZtec X-Max 20, Oxford Instruments, Abingdon, UK) integrated with SEM.

| Elemental composition |          |          |
|-----------------------|----------|----------|
| Sample                | C (at %) | O (at %) |
| GP1                   | 92.5     | 7.5      |
| GP2                   | 95.5     | 4.5      |
| MWCNT                 | 98.5     | 1.5      |

**Table S1.** lists the elemental composition of all C-BNM obtained by EDS. As it can be seen, for all materials, EDS revealed the presence of carbon and oxygen. The obtained results are in a good agreement with the product description of manufacturers-providers.

### Raman spectroscopy

#### Experimental

Raman measurements were performed using a LabRAM HR Raman spectrometer (Horiba Jobin-Yvon, Kyoto, Japan) with laser excitation wavelength of 633 nm and a laser power of 1mW under the 100x objective to avoid heating of the sample.

#### Results

Figure S2 shows Raman spectra of studied C-BNM, characterised by the occurrence of the following bands:

- ~1350  $\text{cm}^{-1}$ ; D band is indicative of impurities and/or structural disorder in the C-BNM sample.
- ~1580  $\text{cm}^{-1}$ ; G band is the result of C-C bond stretching. The G band is sensitive to doping and both the line width and frequency of this peak can be employed to check the doping level.

- $\sim 2685\text{ cm}^{-1}$ ; 2D band corresponding to stresses. The lineshape and width of the 2D mode can be in some cases used to estimate the number of AB stacked graphene layers.

For all studied C-BNM the strong D band indicate the presence of a significant amount of defects. The D mode intensity differs and it determines the disorder in the sample i.e. higher the intensity of D band means increased number of disorder/defects in sample

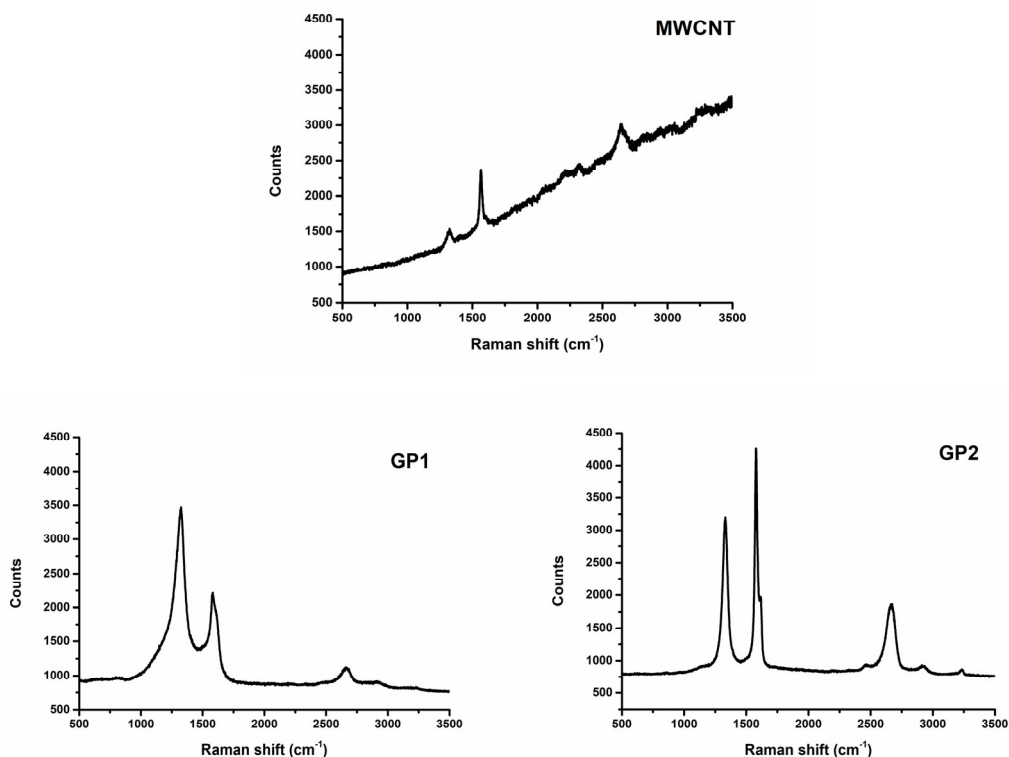

**Figure S2.** Raman spectra of MWCNT, GP1 and GP2

## Thermogravimetric analyses

### Experimental

Thermal decomposition of C-BNM was studied using Differential Scanning Calorimetry (DSC) and Thermogravimetric Analysis (TGA) on STA 449 F1 Jupiter® NETZSCH (Selb, Germany) to determine the combustion temperature and weight loss. Measurements were performed under oxygen atmosphere with a heating rate of 10 K/min.

### Results

Figure S3A-C shows TGA and DSC results

#### A) MWCNT

The oxidation of MWCNT occurred between 700 – 800 °C

DSC scan has an endothermic peak at  $\sim 770\text{ °C}$  which is associated with the thermal combustion of the nanotubes. From the TG scan, at  $\sim 800\text{ °C}$ , the sample burned up with a zero residual mass.

#### B) GP1

The oxidation of GP<sub>1</sub> occurred between 400 – 700 °C

DSC scan has an endothermic peak at  $\sim 650\text{ °C}$  which is associated with the thermal decomposition/combustion of graphene. From the TG scan, at  $\sim 700\text{ °C}$ , the sample burned up

with a residual mass of 6%. This means that ~94% weight loss accompanies the endothermic DSC peak.

C) GP2

The oxidation of GP2 occurred between 300 – 600 °C

DSC scan has an endothermic peak at ~565 °C which is associated with the thermal decomposition/combustion of graphene. From the TG scan, at ~670 °C, the sample burned up with a residual mass of 2%. This means that ~98% weight loss accompanies the endothermic DSC peak. The two peaks at ~310 °C and ~400 °C are presumably associated with the combustion of amorphous carbon.

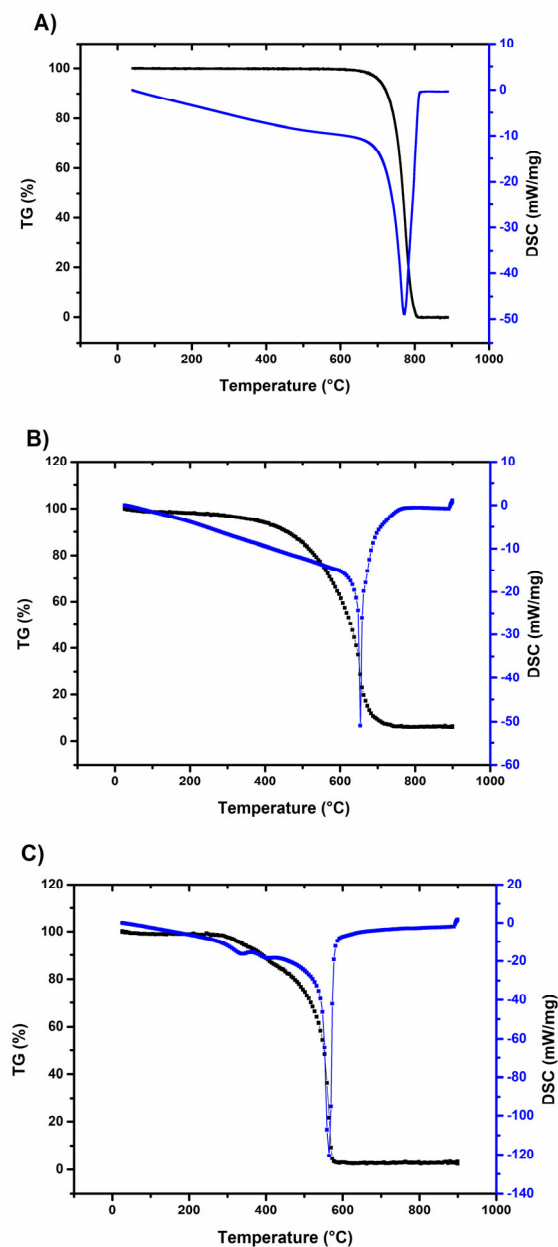

**Figure S3.** TGA (left Y-axis) and TGA (right Y-axis) curves recorded for C-BNM under oxygen atmosphere with a heating rate of 10 K/min

## Cell viability and plasma membrane integrity of isolated monocytes

### Experimental

Cell viability was assessed through lactate dehydrogenase (LDH) assay. Isolated monocytes were seeded in flat bottom 48-well plate at density  $1.5 \times 10^5$  cells per well and exposed to increasing concentration of GP and MWCNT in media (5 – 60  $\mu\text{g/mL}$ ) for 24 – 48 h. Cells with no exposure and cells exposed to sodium cholate were used as controls. Supernatants were centrifuged for 10,000x g for 10 min to get rid of GP and MWCNT and transferred in new flat bottom 96-well plate. The LDH assay was performed according to the manufacturer's protocol. Absorbance was measured in a microplate spectrophotometer Synergy HTX (Biotek, Bad Friedrichshall, Germany) at 490 nm, with 690 nm set as the reference wavelength.

### Results

Cell viability was determined after 24h and 48h of cell exposition to C-BNM (5 – 60  $\mu\text{g/mL}$ ). Studied GP did not induce any significant cell membrane damage and subsequent release of LDH into cytoplasm. MWCNT caused release of LDH (~ 10 – 15%) from damage cell membrane only at higher dose tested (60  $\mu\text{g/mL}$ ) after 24 h and 48 h (Figure S4).

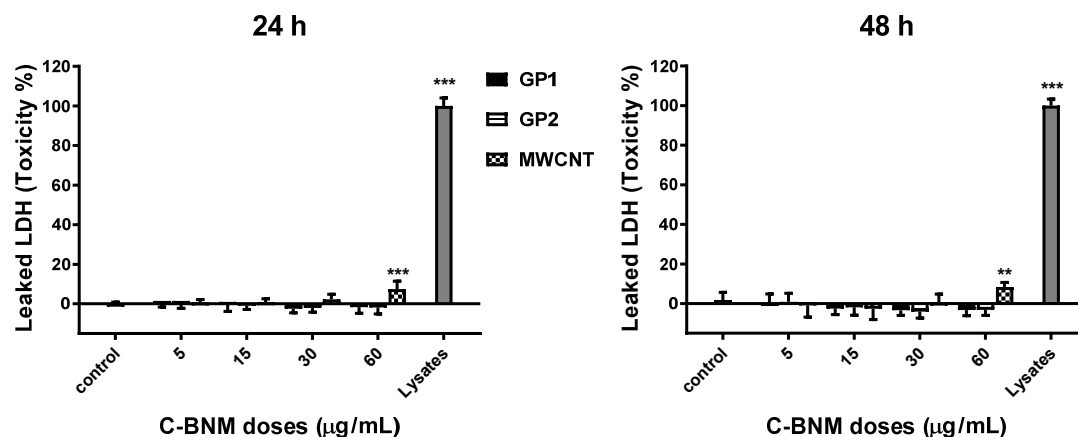

**Figure S4.** Monocytes response to C-BNM; Percentage of cytotoxicity via LDH assay after 24 and 48h. Data are reported as average  $\pm$  standard error of the mean ( $\text{Toxicity \%} = (T-C)/(L-C)*100$ ),  $T$  – test. cells,  $C$  – untreated control,  $L$  – Lysates; the symbol \*\*\*  $P < 0.001$  highlights statistical significance as compared to the corresponding  $C$ .
